# Supplementary material
Source: PubMed Central journal article supplement (PMC3533443)

## Supporting Information

© Copyright Wiley-VCH Verlag GmbH & Co. KGaA, 69451 Weinheim, 2011

### **Isolation, Amino Acid Sequence and Biological Activities of Novel Long-Chain Polyamine-Associated Peptide Toxins from the Sponge *Axinyssa aculeata***

Satoko Matsunaga,<sup>[a]</sup> Mitsuru Jimbo,<sup>[b]</sup> Martin B. Gill,<sup>[c]</sup> L. Leanne Lash-Van Wyhe,<sup>[c]</sup> Michio Murata,<sup>[d]</sup> Ken'ichi Nonomura,<sup>[d]</sup> Geoffrey T. Swanson,<sup>[c]</sup> and Ryuichi Sakai<sup>\*[a]</sup>

cbic\_201100329\_sm\_miscellaneous\_information.pdf

Figure S1. Dose-response curve of ACUs for mice upon i.c.v. injection

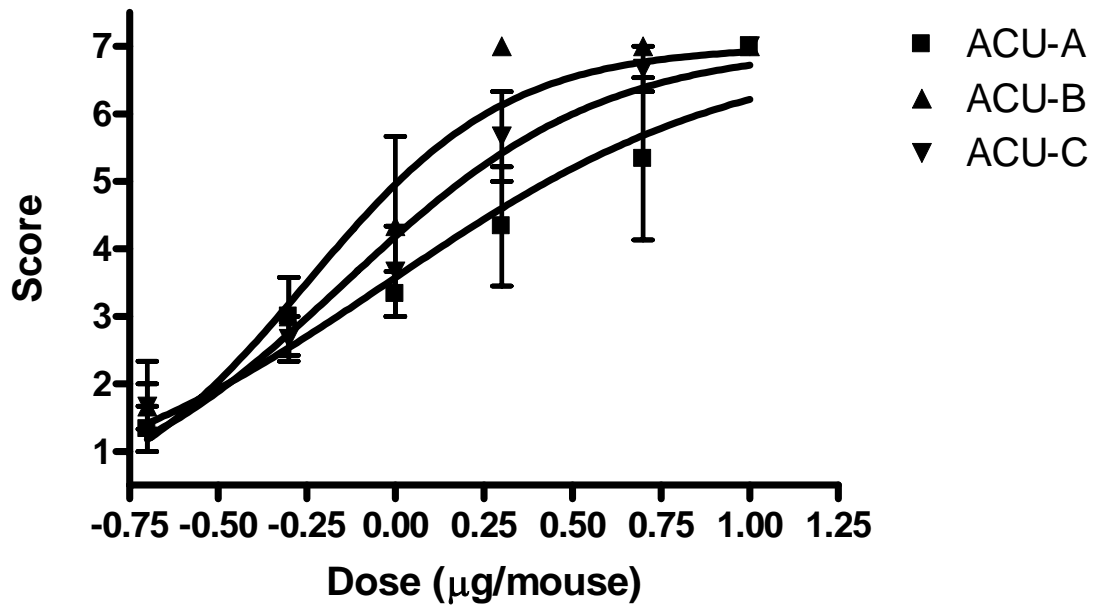

|      | ACU-A  | ACU-B  | ACU-C  |
|------|--------|--------|--------|
| EC50 | 0.9533 | 0.5639 | 0.7216 |

|      | ACU-A           | ACU-B            | ACU-C            |
|------|-----------------|------------------|------------------|
| EC50 | 0.5956 to 1.526 | 0.3992 to 0.7964 | 0.5518 to 0.9436 |

Figure S2.  $^1\text{H}$  NMR spectrum for ACU-A in  $\text{D}_2\text{O}$  (750 MHz)

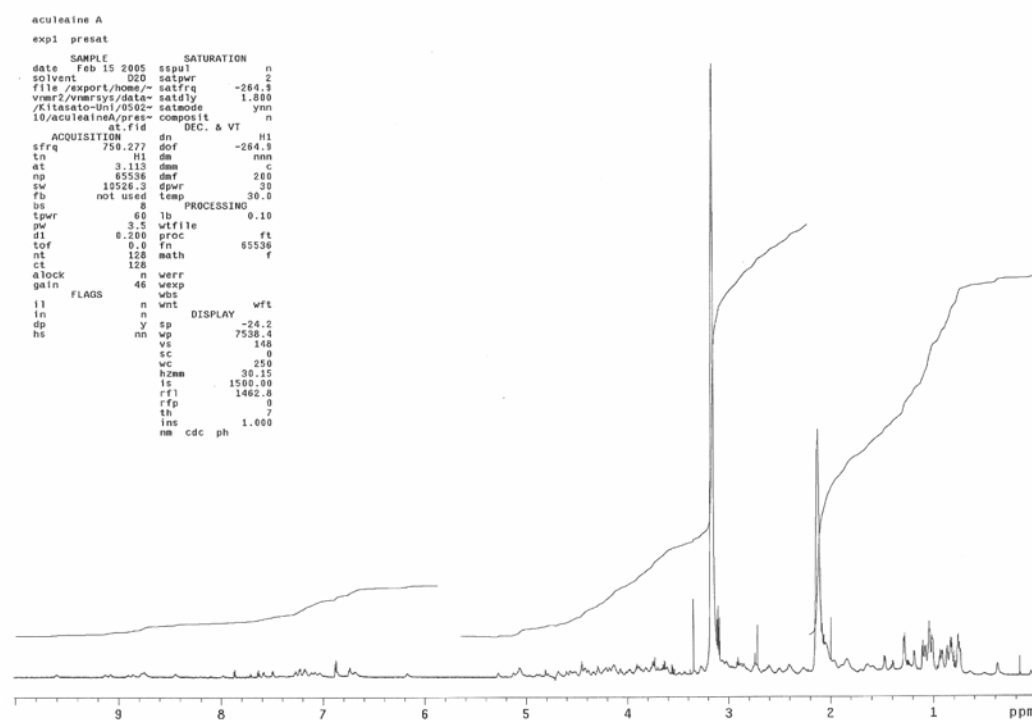

Figure S3.  $^1\text{H}$  NMR spectrum for ACU-B in  $\text{D}_2\text{O}$  (750 MHz)

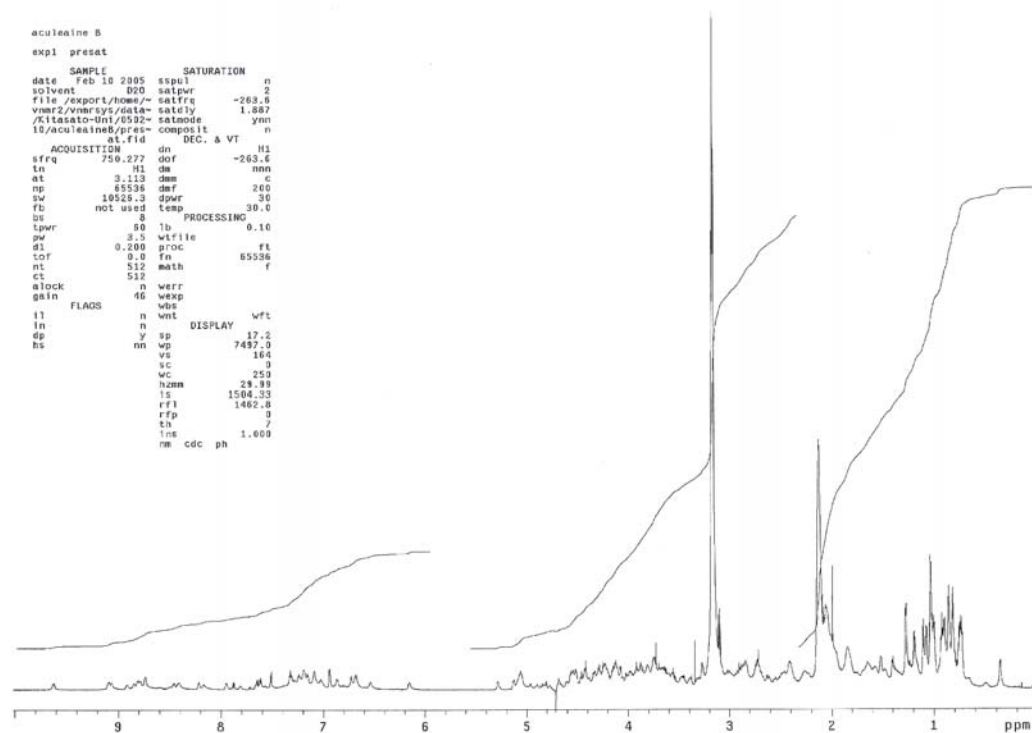

Figure S4. MALDI-TOF MS/MS spectrum for fragment A (ACU-A) and A' (ACU-B)  
precursor ion:  $m/z$  1126

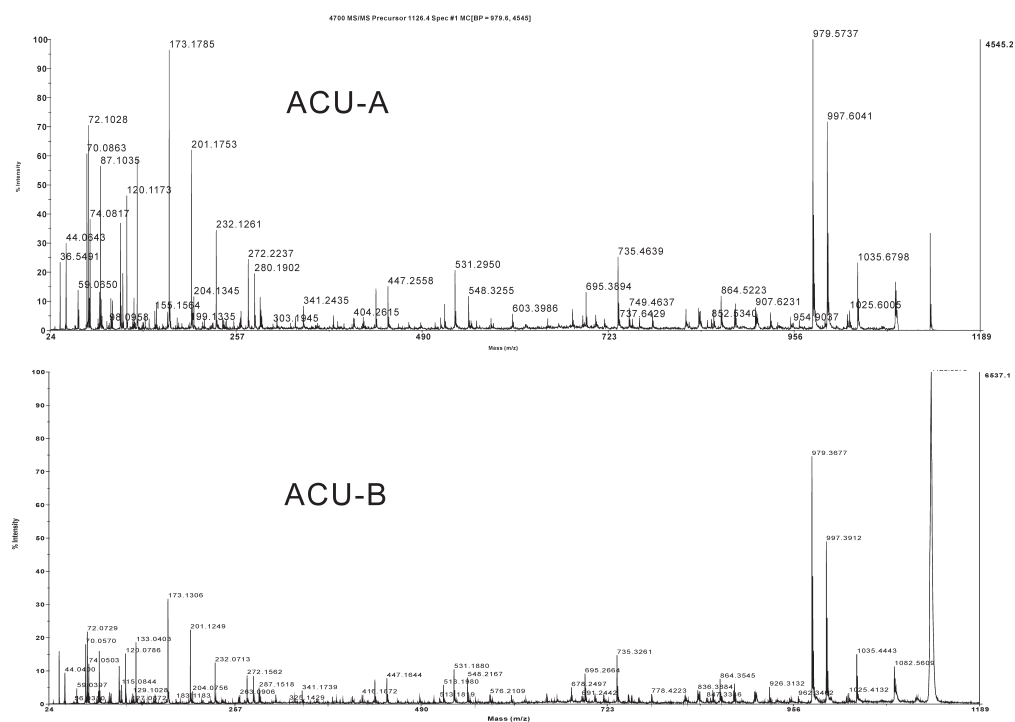

Figure S5. MALDI-TOF MS/MS spectrum for fragment B (ACU-A) and B' (ACU-B)  
precursor ion:  $m/z$  1368

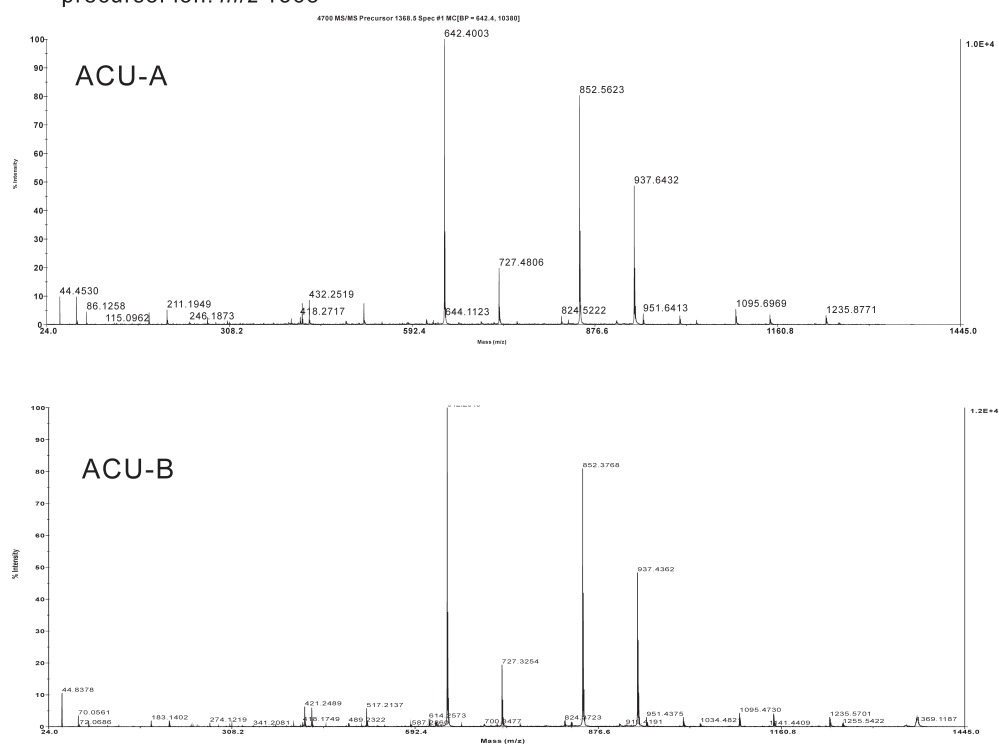

Figure S6. MALDI-TOF MS/MS spectrum for fragment C (ACU-A) and C' (ACU-B)

precursor ion:  $m/z$  2102

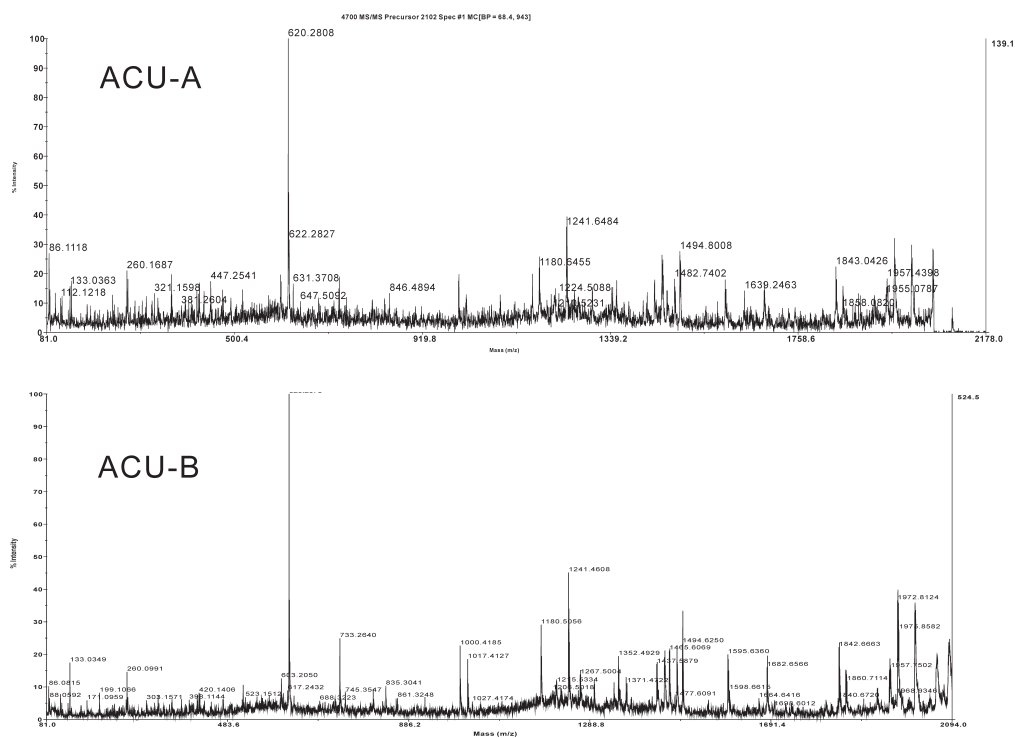

Figure S7. MALDI-TOF MS/MS spectrum for fragment D

precursor ion:  $m/z$  1021

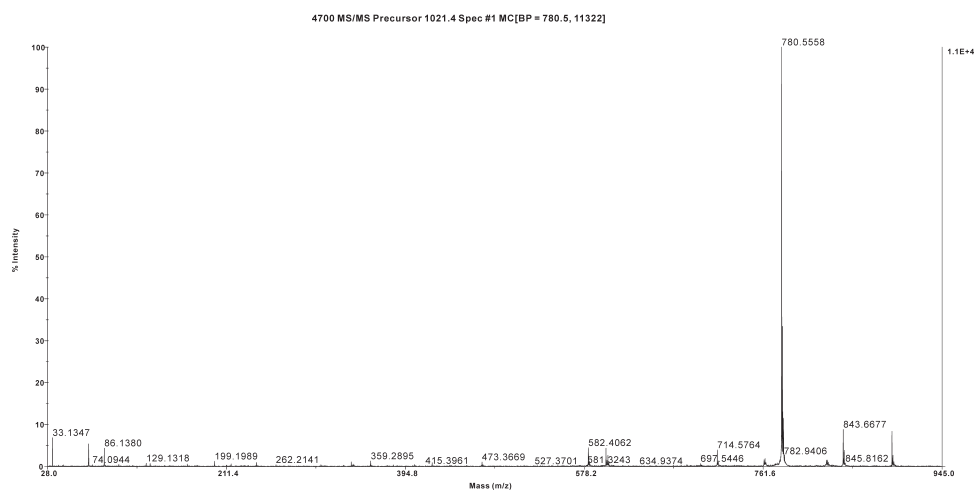

Figure S8.  $^1\text{H}$  NMR spectrum for fragment E in  $\text{D}_2\text{O}$  (600 MHz)

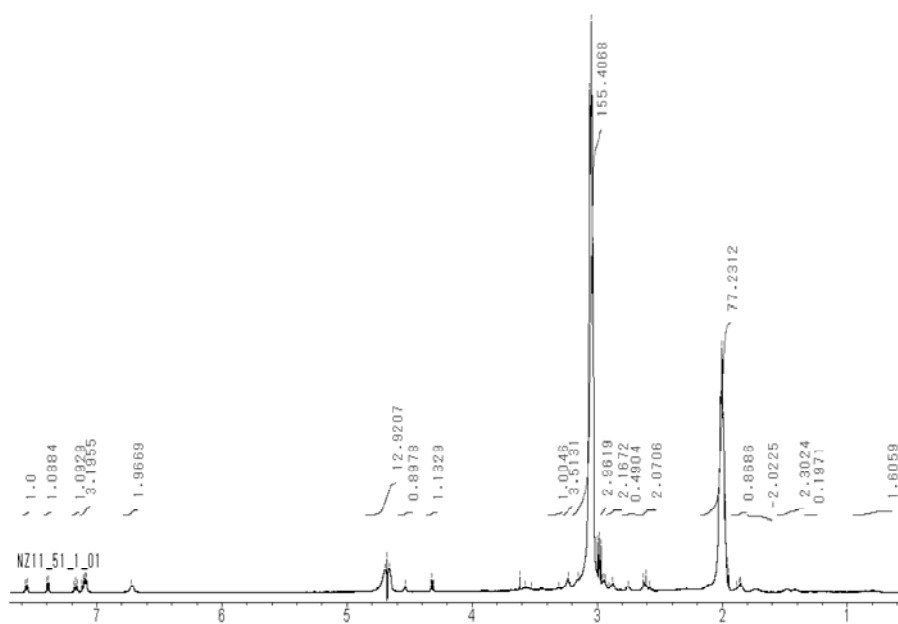

Figure S9. COSY spectrum for fragment E in  $\text{D}_2\text{O}$  (600 MHz)

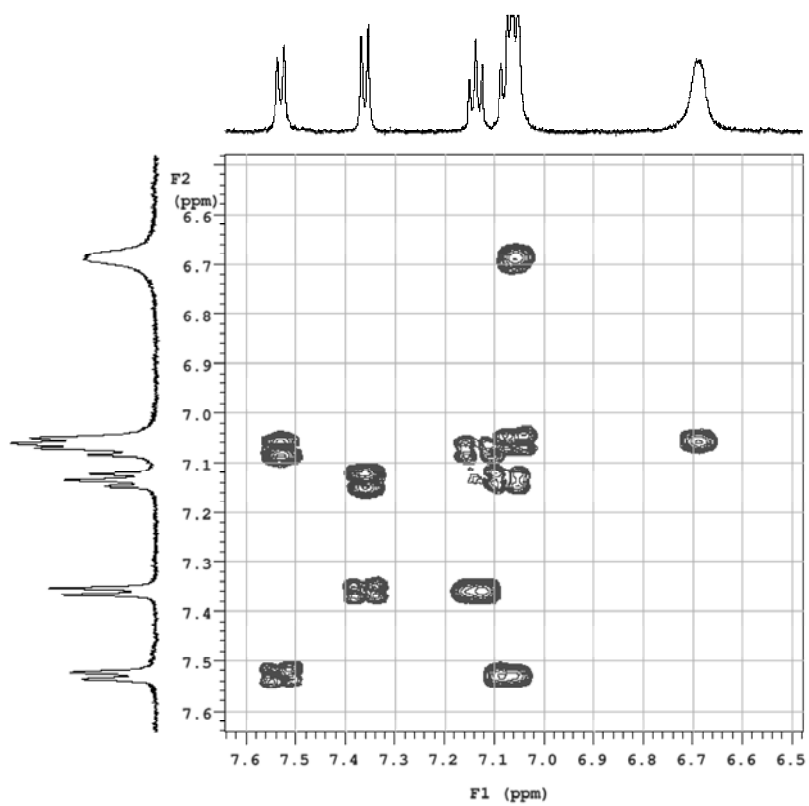

Figure S10. Membrane permeabilizing activity of ACU-A

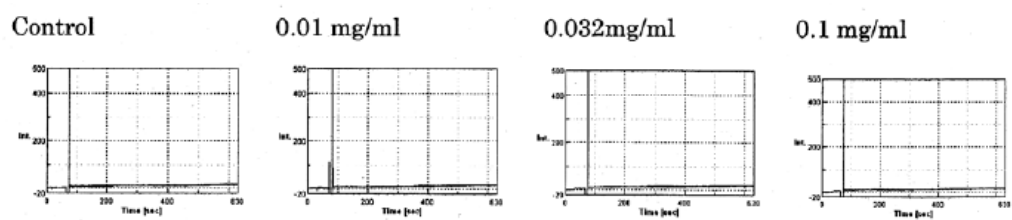

Figure S11. Negative ion MALDI-TOFMS data (Lower molecular region) for ACU-A, B, and LCPA showing presences of sulfate ion at m/z 96.96

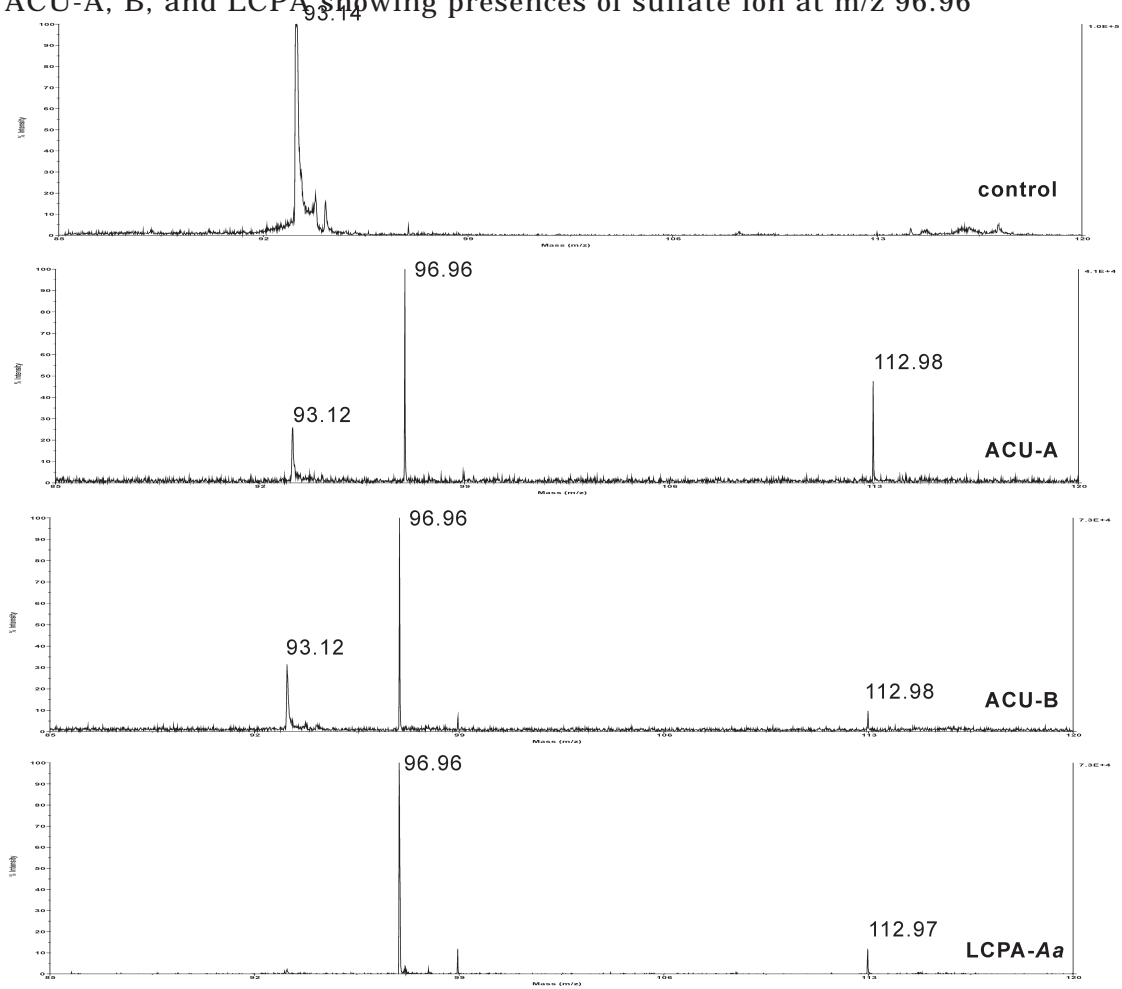

Supplement: NIHMS341091-supplement-Supporting_information.pdf [file NIHMS341091-supplement-Supporting_information.pdf]
